# Supplementary material for: Multi-Omics Analysis Reveals the Regulatory Mechanism of Probiotics on the Growth Performance of Fattening Sheep
Source: MDPI journal article supplement (doi:10.3390/ani14091285), 2024-04-24
Supplement: s1 [file s1]

## Supplementary Materials

**Table S1.** Effects of different probiotics on growth performance of fattening sheep

| Item                        | CON       | <b>Bacillus<br/>licheniformis<br/>group</b> | <b>Bacillus<br/>subtilis<br/>binary<br/>group</b> | <b>Bifidobacterium<br/>triple group</b> | <b>Bifidobacterium<br/>tetravalent<br/>group</b> |
|-----------------------------|-----------|---------------------------------------------|---------------------------------------------------|-----------------------------------------|--------------------------------------------------|
| ADG <sup>1</sup> ,<br>kg/d  | 0.21±0.01 | 0.23 ± 0.01                                 | 0.23 ± 0.02                                       | 0.24 ± 0.01                             | 0.27±0.02                                        |
| ADFI <sup>2</sup> ,<br>kg/d | 1.20±0.07 | 1.22 ± 0.10                                 | 1.21 ± 0.08                                       | 1.22 ± 0.12                             | 1.20±0.07                                        |
| FCR <sup>3</sup>            | 0.18±0.01 | 0.19 ± 0.01                                 | 0.19 ± 0.01                                       | 0.20 ± 0.01                             | 0.23 ± 0.01                                      |

<sup>1</sup>Average daily gain

<sup>2</sup>Feed conversion rate

<sup>3</sup>Average daily feed intake

**Table S2.** Significant differences in metabolites of rumen fluid between PRB and CON groups in fattening sheep

| Name                           | MZ <sup>1</sup> | R . T <sup>2</sup><br>(min) | VIP <sup>3</sup> | Pvalue <sup>4</sup> | FC <sup>5</sup> |
|--------------------------------|-----------------|-----------------------------|------------------|---------------------|-----------------|
| <b>Negative</b>                |                 |                             |                  |                     |                 |
| Phenol                         | 93.036          | 38.397                      | 1.475            | 0.024               | 2.231           |
| p-Cresol                       | 107.050         | 45.147                      | 1.668            | 0.006               | 1.548           |
| Pyrocatechol                   | 109.029         | 46.098                      | 1.641            | 0.006               | 2.696           |
| L-Proline                      | 114.054         | 211.696                     | 1.747            | 0.035               | 0.258           |
| Indole                         | 116.051         | 206.308                     | 1.287            | 0.027               | 2.414           |
| 2-Hydroxy-3-methylbutyric acid | 117.056         | 223.817                     | 1.651            | 0.007               | 1.487           |
| L-Norleucine                   | 130.087         | 150.238                     | 1.793            | 0.030               | 0.236           |
| 5-Hydroxyhexanoic acid         | 131.071         | 190.973                     | 1.384            | 0.008               | 1.576           |
| Anthranilic acid (Vitamin L1)  | 136.040         | 340.703                     | 1.480            | 0.010               | 1.556           |
| Salicylic acid                 | 137.025         | 38.421                      | 1.478            | 0.023               | 2.258           |
| 2-Hydroxyphenylacetic acid     | 151.040         | 184.461                     | 1.564            | 0.007               | 0.561           |
| 3-Hydroxyphenylacetic acid     | 151.040         | 45.070                      | 1.453            | 0.018               | 1.375           |
| p-Hydroxyphenylacetic acid     | 151.040         | 171.694                     | 1.356            | 0.013               | 1.385           |
| L-Cysteinesulfinic acid        | 152.002         | 68.174                      | 1.757            | 0.012               | 1.858           |
| Gentisic acid                  | 153.019         | 68.628                      | 1.614            | 0.004               | 1.608           |
| 3,3-Dimethylglutaric acid      | 159.066         | 82.255                      | 1.954            | 0.000               | 1.737           |
| L-Methionine S-oxide           | 164.038         | 353.148                     | 1.516            | 0.024               | 0.547           |
| Uric acid                      | 167.020         | 302.720                     | 1.725            | 0.029               | 0.528           |
| Suberic acid                   | 173.081         | 329.530                     | 1.262            | 0.048               | 1.250           |
| N2-Acetyl-L-ornithine          | 173.092         | 345.316                     | 1.540            | 0.025               | 0.560           |
| 4-Pyridoxic acid               | 182.046         | 40.633                      | 1.349            | 0.021               | 1.368           |
| Azelaic acid                   | 187.098         | 315.988                     | 1.631            | 0.008               | 1.340           |
| 5-Hydroxyindoleacetate         | 190.050         | 199.693                     | 1.765            | 0.010               | 2.507           |
| Perseitol                      | 193.069         | 157.362                     | 1.793            | 0.039               | 0.116           |
| Sebacic acid                   | 201.113         | 300.962                     | 1.571            | 0.009               | 1.308           |
| Pantothenol                    | 204.123         | 75.948                      | 1.657            | 0.002               | 1.604           |
| p-Hydroxycinnamaldehyde        | 207.066         | 43.848                      | 1.656            | 0.007               | 1.431           |
| resorcinol                     | 219.065         | 33.583                      | 1.763            | 0.001               | 0.601           |
| Xanthurenic acid               | 221.056         | 120.423                     | 1.492            | 0.009               | 1.290           |
| N-Acetyl-L-tyrosine            | 222.076         | 204.511                     | 1.521            | 0.017               | 0.604           |
| Tropic acid                    | 225.075         | 330.730                     | 1.988            | 0.001               | 2.394           |
| Deoxycytidine                  | 227.091         | 187.353                     | 1.853            | 0.002               | 2.096           |
| Traumatic Acid                 | 227.128         | 181.055                     | 1.551            | 0.028               | 1.505           |
| d-Dethiobiotin                 | 230.148         | 270.142                     | 1.480            | 0.015               | 1.374           |
| L-Cystine                      | 239.015         | 165.249                     | 1.799            | 0.001               | 0.620           |
| Lumichrome                     | 241.070         | 66.168                      | 1.546            | 0.002               | 1.410           |
| Pentobarbital                  | 242.146         | 160.486                     | 1.380            | 0.025               | 1.545           |

|                                                                         |         |         |       |       |       |
|-------------------------------------------------------------------------|---------|---------|-------|-------|-------|
| Nicotinamide                                                            | 243.086 | 103.757 | 1.968 | 0.001 | 2.384 |
| Zingerone                                                               | 253.106 | 45.158  | 1.372 | 0.049 | 1.816 |
| D-Glucosamine 1-phosphate<br>(Glucosamine-1P)                           | 258.037 | 391.772 | 1.217 | 0.022 | 1.282 |
| Coumestrol                                                              | 267.028 | 43.948  | 1.646 | 0.003 | 0.714 |
| Phloretin                                                               | 273.075 | 46.518  | 2.538 | 0.049 | 1.250 |
| D-Neopterin                                                             | 274.062 | 76.572  | 1.363 | 0.043 | 1.634 |
| Niflumic Acid                                                           | 281.055 | 106.464 | 1.812 | 0.001 | 1.332 |
| 12-Oxo-2,3-dinor-10,15-<br>phytodienoic acid                            | 285.149 | 178.096 | 1.957 | 0.000 | 1.656 |
| Nname,cis-9,10-Epoxystearic acid                                        | 297.241 | 66.948  | 1.261 | 0.035 | 0.607 |
| N1-Methyl-2-pyridone-5-<br>carboxamide                                  | 303.105 | 27.580  | 1.788 | 0.002 | 1.802 |
| 2E-Eicosenoic acid                                                      | 309.279 | 41.938  | 1.276 | 0.047 | 0.596 |
| Prunasin                                                                | 316.086 | 302.320 | 1.190 | 0.040 | 1.508 |
| Hesperetin                                                              | 323.053 | 113.784 | 1.480 | 0.035 | 1.744 |
| 2-Amino-3-methoxy-benzoic acid                                          | 333.107 | 152.105 | 1.879 | 0.000 | 1.668 |
| Flutamide                                                               | 335.088 | 38.454  | 1.843 | 0.000 | 0.656 |
| Erucic acid                                                             | 337.309 | 41.691  | 1.264 | 0.047 | 0.586 |
| Sphinganine                                                             | 338.255 | 25.674  | 1.581 | 0.045 | 0.451 |
| Stearic acid                                                            | 343.282 | 48.450  | 1.669 | 0.006 | 0.709 |
| Adenosine 3'-monophosphate                                              | 346.053 | 390.849 | 1.431 | 0.037 | 0.644 |
| 5(S)-HpETE                                                              | 395.253 | 154.766 | 1.947 | 0.000 | 1.752 |
| 1-Palmitoyl-2-oleoyl-<br>phosphatidylglycerol                           | 747.514 | 47.200  | 1.767 | 0.024 | 0.142 |
| 2-Oleoyl-1-palmitoyl-sn-glycero-3-<br>phosphocholine(PC(16:0/18:1(9Z))) | 758.562 | 132.080 | 1.904 | 0.003 | 0.459 |
| Ginsenoside Rg3                                                         | 783.487 | 144.285 | 1.583 | 0.002 | 0.637 |
| <b>Postive</b>                                                          |         |         |       |       |       |
| Diethanolamine                                                          | 70.067  | 299.565 | 1.429 | 0.006 | 0.565 |
| Glutaraldehyde                                                          | 83.050  | 371.407 | 1.163 | 0.031 | 0.772 |
| L-Alanine                                                               | 90.056  | 333.993 | 1.128 | 0.039 | 0.737 |
| 3,3-Dimethylacrylic acid                                                | 101.060 | 371.407 | 1.221 | 0.026 | 0.716 |
| L-Proline                                                               | 116.072 | 299.692 | 1.496 | 0.003 | 0.548 |
| 5-Aminopentanoic acid                                                   | 118.086 | 386.709 | 1.071 | 0.032 | 0.749 |
| 3-Aminobenzoic acid                                                     | 120.045 | 43.681  | 1.495 | 0.002 | 1.293 |
| Nicotinamide                                                            | 123.056 | 63.454  | 1.092 | 0.028 | 0.590 |
| Quinone                                                                 | 126.055 | 286.965 | 1.576 | 0.007 | 0.565 |
| 1,4-Dihydroxybenzene                                                    | 128.071 | 79.520  | 1.699 | 0.000 | 1.515 |
| L-Pipecolic acid                                                        | 130.087 | 264.703 | 1.414 | 0.020 | 3.522 |
| 3-Ureidopropionate                                                      | 133.061 | 295.565 | 1.265 | 0.035 | 0.471 |
| Cyclohexylammonium                                                      | 138.066 | 50.561  | 1.129 | 0.008 | 0.440 |
| DL-2-Aminoadipic acid                                                   | 144.065 | 280.845 | 1.743 | 0.004 | 0.336 |
| N,N-Bis(2-hydroxyethyl)glycine                                          | 146.081 | 110.586 | 1.640 | 0.001 | 1.507 |

|                                           |         |         |       |       |        |
|-------------------------------------------|---------|---------|-------|-------|--------|
| (3-Carboxypropyl)trimethylammonium cation | 146.119 | 364.221 | 1.367 | 0.016 | 1.650  |
| Dimethylbenzimidazole                     | 147.092 | 46.307  | 1.749 | 0.000 | 0.378  |
| D-Lyxose                                  | 150.055 | 104.018 | 1.547 | 0.001 | 1.922  |
| Phenylephrine                             | 150.091 | 236.31  | 1.183 | 0.049 | 0.679  |
| N-Acetylglutamine                         | 153.066 | 309.700 | 1.116 | 0.046 | 1.353  |
| L-Valine                                  | 159.113 | 246.734 | 1.499 | 0.005 | 0.366  |
| trans-2-Hydroxycinnamic acid              | 165.054 | 288.816 | 1.171 | 0.046 | 0.715  |
| DL-Methionine sulfoxide                   | 166.051 | 366.342 | 1.444 | 0.031 | 0.478  |
| 1-Methylxanthine                          | 167.053 | 41.177  | 1.582 | 0.009 | 1.595  |
| Pyridoxal (Vitamin B6)                    | 168.065 | 104.494 | 1.361 | 0.029 | 1.653  |
| Pyridoxine                                | 170.081 | 120.135 | 1.542 | 0.019 | 3.428  |
| L-Norleucine                              | 173.126 | 258.615 | 1.728 | 0.000 | 0.541  |
| Ethyl hydrogen malonate                   | 174.076 | 101.712 | 1.284 | 0.042 | 1.482  |
| N-Carboxyethyl-.gamma.-aminobutyric acid  | 176.092 | 366.400 | 1.577 | 0.012 | 2.658  |
| (Z)-4-Decen-1-ol                          | 179.143 | 178.522 | 1.747 | 0.000 | 1.859  |
| Dacarbazine                               | 183.099 | 111.260 | 1.509 | 0.004 | 1.411  |
| 4-Pyridoxic acid                          | 184.061 | 41.190  | 1.673 | 0.006 | 2.033  |
| Ala-Leu                                   | 185.128 | 241.216 | 1.743 | 0.014 | 16.798 |
| Homogentisic acid                         | 186.076 | 287.134 | 1.548 | 0.009 | 0.613  |
| Hydroxyacetone                            | 187.036 | 277.060 | 1.427 | 0.029 | 2.735  |
| 2-Methylglutaric acid                     | 188.092 | 323.008 | 1.667 | 0.000 | 1.568  |
| 4-Hydroxybutanoic acid lactone            | 190.107 | 358.502 | 1.381 | 0.017 | 1.351  |
| Ornithine                                 | 196.105 | 132.256 | 1.443 | 0.019 | 2.503  |
| N-Acetyl-L-Histidine                      | 198.087 | 293.339 | 1.530 | 0.005 | 0.523  |
| .beta.-Citronellol                        | 201.123 | 321.480 | 1.377 | 0.032 | 2.162  |
| 3-Hydroxybenzoate                         | 202.044 | 231.489 | 1.334 | 0.013 | 0.973  |
| 3-Methoxy-4-hydroxyphenylethyleneglycol   | 202.108 | 344.396 | 1.492 | 0.013 | 1.393  |
| Xanthurenic acid                          | 206.043 | 41.929  | 1.585 | 0.003 | 1.633  |
| Pantothenol                               | 206.138 | 76.634  | 1.663 | 0.008 | 1.861  |
| 4-Aminobutyric acid                       | 207.137 | 47.113  | 1.363 | 0.028 | 1.695  |
| Dihydrolipoate (dihydrolipoic acid)       | 208.063 | 280.953 | 1.742 | 0.005 | 0.313  |
| 3-Methoxytyramine                         | 209.128 | 403.358 | 1.288 | 0.025 | 0.642  |
| 2,2-Dimethyl Succinic acid                | 210.076 | 127.554 | 1.695 | 0.000 | 1.662  |
| Jasmonic acid                             | 211.133 | 181.583 | 1.335 | 0.010 | 1.291  |
| Limonene-1,2-epoxide                      | 213.148 | 50.191  | 1.250 | 0.026 | 0.453  |
| Pro-Thr                                   | 216.105 | 369.882 | 1.408 | 0.035 | 1.555  |
| N-.alpha.-Acetyl-L-arginine               | 217.124 | 320.733 | 1.488 | 0.007 | 1.516  |
| 6-Benzylaminopurine                       | 226.107 | 51.093  | 1.150 | 0.038 | 1.514  |
| Desoxypeganine                            | 233.128 | 194.622 | 1.416 | 0.003 | 1.779  |
| Indoleacetic acid                         | 236.091 | 345.116 | 1.383 | 0.018 | 1.575  |

|                               |         |         |       |       |       |
|-------------------------------|---------|---------|-------|-------|-------|
| N-Formylmethionine            | 238.070 | 180.435 | 1.079 | 0.044 | 0.797 |
| Gly-Val                       | 238.116 | 296.570 | 1.792 | 0.000 | 1.990 |
| .gamma.-L-Glu-.epsilon.-L-Lys | 240.137 | 34.912  | 1.404 | 0.025 | 0.435 |
| Nicotinuric acid              | 241.082 | 320.768 | 1.217 | 0.034 | 1.212 |
| Thymidine                     | 243.097 | 102.313 | 1.220 | 0.046 | 2.330 |
| Gly-Gln                       | 248.064 | 173.779 | 1.226 | 0.021 | 2.267 |
| Myristic acid                 | 251.200 | 107.326 | 1.467 | 0.004 | 0.481 |
| 4-Hydroxybenzaldehyde         | 262.110 | 196.019 | 1.217 | 0.019 | 2.048 |
| Coumestrol                    | 269.043 | 45.321  | 1.747 | 0.000 | 0.432 |
| Formononetin                  | 269.080 | 40.412  | 1.163 | 0.031 | 0.654 |
| Larixinic Acid                | 270.097 | 388.756 | 1.628 | 0.001 | 1.551 |
| Met-Gln                       | 277.110 | 286.803 | 1.496 | 0.002 | 0.586 |
| alpha-Linolenic acid          | 279.231 | 41.675  | 1.587 | 0.000 | 0.247 |
| 1-Methyladenosine             | 282.119 | 284.845 | 1.173 | 0.037 | 0.777 |
| Temazepam                     | 283.059 | 42.872  | 1.531 | 0.001 | 0.472 |
| trans-Vaccenic acid           | 283.262 | 38.648  | 1.505 | 0.001 | 0.245 |
| Glycerol 1-myristate          | 285.241 | 46.109  | 1.622 | 0.000 | 0.327 |
| Val-Met                       | 290.146 | 296.286 | 1.604 | 0.000 | 1.742 |
| Procaterol                    | 291.169 | 239.327 | 1.613 | 0.001 | 1.556 |
| Ergothioneine                 | 294.117 | 286.832 | 1.547 | 0.002 | 0.588 |
| Lys-Ser                       | 300.095 | 272.294 | 1.125 | 0.042 | 0.750 |
| Retinol (Vitamin A)           | 304.262 | 45.472  | 1.812 | 0.005 | 0.182 |
| L-Anserine                    | 307.070 | 45.231  | 1.124 | 0.002 | 0.503 |
| Phenylacetic acid             | 311.065 | 37.475  | 1.571 | 0.001 | 0.584 |
| 16-hydroxy hexadecanoic acid  | 314.276 | 46.195  | 1.639 | 0.000 | 0.298 |
| Gln-Asn                       | 321.140 | 240.220 | 1.248 | 0.033 | 0.767 |
| (+)-8,9-DHET                  | 321.241 | 47.027  | 1.416 | 0.005 | 0.695 |
| Erucic acid                   | 321.313 | 34.197  | 1.250 | 0.038 | 0.452 |
| Met-Glu                       | 323.058 | 126.665 | 1.556 | 0.001 | 2.102 |
| 3-Methylphenylacetic acid     | 323.123 | 149.091 | 1.548 | 0.001 | 1.414 |
| Diethyl sebacate              | 325.142 | 38.576  | 1.556 | 0.001 | 0.548 |
| Phe-Pro                       | 326.147 | 39.037  | 1.691 | 0.000 | 0.455 |
| Lys-Trp                       | 332.190 | 365.621 | 1.762 | 0.000 | 1.894 |
| Benzylbutylphthalate          | 335.125 | 43.298  | 1.438 | 0.003 | 0.548 |
| N-Tigloylglycine              | 337.142 | 36.692  | 1.622 | 0.000 | 0.421 |
| Tyr-Asp                       | 338.131 | 313.025 | 1.750 | 0.000 | 2.087 |
| 20-Hydroxyarachidonic acid    | 338.269 | 44.462  | 1.296 | 0.007 | 0.555 |
| Erucamide                     | 338.342 | 34.253  | 1.178 | 0.045 | 0.446 |
| Arg-Gln                       | 341.137 | 42.710  | 1.347 | 0.004 | 0.581 |
| Adenosine 3'-monophosphate    | 348.069 | 391.611 | 1.283 | 0.029 | 0.614 |
| L-Fucose                      | 351.121 | 37.354  | 1.699 | 0.000 | 0.336 |
| Arg-Tyr                       | 360.169 | 38.334  | 1.778 | 0.000 | 0.534 |
| Bisdemethoxycurcumin          | 369.131 | 39.145  | 1.287 | 0.007 | 0.575 |
| Lithocholic acid              | 399.287 | 35.143  | 1.144 | 0.029 | 0.567 |

|                                                                |         |         |        |       |       |
|----------------------------------------------------------------|---------|---------|--------|-------|-------|
| .delta.-Tocopherol                                             | 402.344 | 33.355  | 1.677  | 0.000 | 0.370 |
| Desmosterol                                                    | 407.329 | 36.622  | 1.744  | 0.000 | 0.465 |
| Lathosterol                                                    | 409.344 | 34.995  | 1.816  | 0.000 | 0.457 |
| Lanosterol                                                     | 409.380 | 32.825  | 1.261  | 0.044 | 0.343 |
| gamma-Tocopherol                                               | 416.361 | 33.061  | 1.673  | 0.000 | 0.369 |
| Dihydrotachysterol                                             | 421.344 | 34.151  | 1.805  | 0.000 | 0.251 |
| 6"-O-Acetyldaidzin                                             | 423.116 | 50.422  | 1.645  | 0.001 | 0.640 |
| N-Acetyl-D-lactosamine                                         | 428.122 | 46.245  | 1.353  | 0.009 | 0.703 |
| Hexacosanoic acid                                              | 441.370 | 34.368  | 1.772  | 0.000 | 0.388 |
| Uvaol                                                          | 443.384 | 32.823  | 1.654  | 0.000 | 0.360 |
| Enoxolone                                                      | 453.333 | 48.639  | 1.669  | 0.000 | 0.532 |
| 1-Palmitoyl-2-hydroxy-sn-glycero-3-phosphoethanolamine         | 454.292 | 187.791 | 1.329  | 0.011 | 0.341 |
| Ascorbic acid 6-palmitate                                      | 456.296 | 187.872 | 1.421  | 0.008 | 0.395 |
| Ergocalciferol (Vitamin D2)                                    | 457.364 | 34.589  | 1.768  | 0.000 | 0.311 |
| 25-Hydroxycholesterol                                          | 463.376 | 33.061  | 1.783  | 0.000 | 0.228 |
| Bufexamac                                                      | 464.276 | 45.480  | 1.523  | 0.011 | 0.265 |
| 1-Myristoyl-sn-glycero-3-phosphocholine                        | 468.306 | 196.203 | 1.243  | 0.032 | 0.366 |
| Cyclopamine                                                    | 472.347 | 47.816  | 1.5009 | 0.022 | 0.442 |
| 1-Stearoyl-2-hydroxy-sn-glycero-3-phosphoethanolamine          | 482.321 | 184.309 | 1.252  | 0.025 | 0.385 |
| Verapamil                                                      | 490.288 | 45.375  | 1.275  | 0.045 | 0.468 |
| 1-Palmitoyl-sn-glycero-3-phosphocholine                        | 496.338 | 181.629 | 1.435  | 0.034 | 0.239 |
| Pristimerin                                                    | 528.303 | 159.169 | 1.408  | 0.033 | 0.237 |
| Bata-Carotene                                                  | 536.427 | 130.761 | 1.708  | 0.002 | 0.320 |
| 1-O-(cis-9-Octadecenyl)-2-O-acetyl-sn-glycero-3-phosphocholine | 551.388 | 141.262 | 1.175  | 0.024 | 0.486 |
| Geranylgeraniol                                                | 619.486 | 45.372  | 1.370  | 0.009 | 0.376 |
| 1-Palmitoyl-2-oleoyl-sn-glycero-3-phosphoethanolamine          | 718.533 | 46.126  | 1.717  | 0.000 | 0.299 |
| PC(16:0/16:0)                                                  | 756.549 | 131.846 | 1.872  | 0.001 | 0.062 |
| Thioetheramide-PC                                              | 774.559 | 141.189 | 1.837  | 0.003 | 0.058 |
| Sphingomyelin (d18:1/18:0)                                     | 775.555 | 45.352  | 1.812  | 0.000 | 0.216 |

<sup>1</sup>MZ = mass-to-charge ratio.

<sup>2</sup>R.T = represents retention time.

<sup>3</sup>VIP >1 and <sup>4</sup>P-value<0.05 are listed in the table. P -values were calculated according to Student's T-test (n=6).

<sup>5</sup>FC = fold change. If the fold change value is less than 1, it means that there is less metabolite in the PRB group than in the CON group.

**Table S3.** Pathway analysis of rumen fluid metabolomics in PRB and CON groups of fattening sheep

| Pathway                                             | Total | Hits <sup>1</sup> | Raw P <sup>2</sup> | Impact <sup>3</sup> | Hits compounds                                                                                              |
|-----------------------------------------------------|-------|-------------------|--------------------|---------------------|-------------------------------------------------------------------------------------------------------------|
| Vitamin B6 metabolism                               | 9     | 3                 | 0.003              | 0.569               | Pyridoxine cpd:C00314; Pyridoxal cpd:C00250; 4-Pyridoxic acid cpd:C00847                                    |
| Tyrosine metabolism                                 | 42    | 4                 | 0.050              | 0.049               | Metanephrine cpd:C05588; 3-Methoxytyramine cpd:C05587; Homogentisic acid cpd:C00544; Vanylglycol cpd:C05594 |
| Riboflavin metabolism                               | 11    | 2                 | 0.051              | 0.333               | Hydroquinone cpd:C00530; Quinone cpd:C00472                                                                 |
| Pantothenate and CoA biosynthesis                   | 15    | 2                 | 0.089              | 0.041               | Ureidopropionic acid cpd:C02642; L-Valine cpd:C00183                                                        |
| Ubiquinone and other terpenoid-quinone biosynthesis | 3     | 1                 | 0.098              | 0                   | Homogentisic acid cpd:C00544                                                                                |
| beta-Alanine metabolism                             | 17    | 2                 | 0.110              | 0.222               | Ureidopropionic acid cpd:C02642; Anserine cpd:C01262                                                        |
| Steroid biosynthesis                                | 35    | 3                 | 0.111              | 0.205               | Lathosterol cpd:C01189; Lanosterin cpd:C01724; Desmosterol cpd:C01802                                       |
| alpha-Linolenic acid metabolism                     | 9     | 1                 | 0.267              | 1                   | Alpha-Linolenic acid cpd:C06427                                                                             |
| Valine, leucine and isoleucine biosynthesis         | 11    | 1                 | 0.316              | 0.333               | L-Valine cpd:C00183                                                                                         |
| Pyrimidine metabolism                               | 37    | 2                 | 0.358              | 0.021               | Ureidopropionic acid cpd:C02642; Thymidine cpd:C00214                                                       |
| Nicotinate and nicotinamide metabolism              | 13    | 1                 | 0.362              | 0.159               | Niacinamide cpd:C00153                                                                                      |
| Biosynthesis of unsaturated fatty acids             | 42    | 2                 | 0.419              | 0                   | Erucic acid cpd:C08316; Alpha-Linolenic acid cpd:C06427                                                     |
| Fructose and mannose metabolism                     | 19    | 1                 | 0.482              | 0                   | L-Fucose cpd:C01019                                                                                         |
| Lysine degradation                                  | 20    | 2                 | 0.500              | 0                   | Aminoadipic acid cpd:C00956                                                                                 |

|                                             |    |   |       |       |                                                   |
|---------------------------------------------|----|---|-------|-------|---------------------------------------------------|
| Aminoacyl-tRNA biosynthesis                 | 64 | 1 | 0.648 | 0     | L-Valine cpd:C00183; L-Proline cpd:C00148         |
| Amino sugar and nucleotide sugar metabolism | 37 | 1 | 0.724 | 0     | L-Fucose cpd:C01019                               |
| Fatty acid biosynthesis                     | 38 | 2 | 0.734 | 0     | Myristic acid cpd:C06424                          |
| Valine, leucine and isoleucine degradation  | 38 | 1 | 0.734 | 0     | L-Valine cpd:C00183                               |
| Tryptophan metabolism                       | 41 | 1 | 0.761 | 0     | Indoleacetic acid cpd:C00954                      |
| Arginine and proline metabolism             | 44 | 1 | 0.785 | 0.078 | L-Proline cpd:C00148                              |
| Primary bile acid biosynthesis              | 46 | 1 | 0.800 | 0.011 | 25-Hydroxycholesterol cpd:C15519                  |
| Cysteine and methionine metabolism          | 28 | 2 | 0.141 | 0.023 | L-Cystine cpd:C00491; 3-Sulfinoalanine cpd:C00606 |
| Taurine and hypotaurine metabolism          | 7  | 1 | 0.155 | 0.250 | 3-Sulfinoalanine cpd:C00606                       |
| Phenylalanine metabolism                    | 9  | 1 | 0.195 | 0     | Ortho-Hydroxyphenylacetic acid cpd:C05852         |
| Sphingolipid metabolism                     | 21 | 1 | 0.398 | 0.143 | Sphinganine cpd:C00836                            |
| Purine metabolism                           | 68 | 1 | 0.812 | 0.008 | Uric acid cpd:C00366                              |

<sup>1</sup> Hits represent the number of significantly different ruminal metabolites matched in one pathway.

<sup>2</sup> P is the original P value obtained by pathway analysis.

<sup>3</sup> Impact is the influencing factor of the pathway obtained by topology analysis.



**Table S4.** Significant differences in metabolites between PRB group and CON group

in serum of fattening sheep

| Name                              | MZ      | R.T(min) | VIP   | Pvalue | FC    |
|-----------------------------------|---------|----------|-------|--------|-------|
| <b>Negative</b>                   |         |          |       |        |       |
| Pyruvate                          | 87.001  | 121.770  | 1.789 | 0.029  | 2.186 |
| 4-Nitrophenol                     | 138.019 | 38.009   | 2.151 | 0.000  | 0.563 |
| 2-Hydroxyadenine                  | 167.071 | 48.673   | 1.460 | 0.046  | 2.080 |
| Glycerol 3-phosphate              | 171.006 | 372.989  | 2.136 | 0.001  | 0.588 |
| Urocanic acid                     | 174.995 | 24.518   | 1.921 | 0.018  | 3.985 |
| L-Ascorbic acid                   | 175.024 | 294.968  | 1.992 | 0.012  | 2.044 |
| Allantoate/Allantoic acid         | 175.047 | 333.298  | 2.337 | 0.000  | 0.282 |
| Beta-Alanine                      | 177.091 | 48.385   | 1.997 | 0.002  | 0.411 |
| Hydroxyphenyllactic acid          | 181.050 | 177.757  | 1.488 | 0.030  | 1.460 |
| Dihydrothymine                    | 187.072 | 372.274  | 2.169 | 0.000  | 0.296 |
| D-galacturonic acid               | 193.035 | 362.862  | 1.406 | 0.047  | 0.914 |
| Citramalic acid                   | 207.050 | 287.748  | 1.490 | 0.036  | 1.977 |
| L-Kynurenine                      | 207.077 | 260.097  | 1.690 | 0.034  | 0.712 |
| Indoxyl sulfate                   | 212.001 | 33.384   | 1.881 | 0.001  | 0.552 |
| Pyrocatechol                      | 219.065 | 34.008   | 1.798 | 0.038  | 1.655 |
| Lipoamide                         | 221.081 | 47.500   | 1.959 | 0.018  | 0.185 |
| Pindone                           | 229.088 | 186.235  | 1.965 | 0.040  | 2.546 |
| Suberylglycine                    | 230.102 | 326.586  | 1.508 | 0.021  | 0.612 |
| Glucosamine                       | 238.092 | 296.552  | 1.809 | 0.007  | 0.658 |
| Phosphorylcholine                 | 242.079 | 373.433  | 2.311 | 0.000  | 0.596 |
| Stavudine                         | 245.056 | 167.719  | 2.016 | 0.001  | 0.384 |
| Muramic acid                      | 250.093 | 352.874  | 1.532 | 0.019  | 0.495 |
| 5'-O-methylthymidine              | 256.104 | 144.418  | 2.136 | 0.008  | 0.128 |
| (R)-mevalonic acid 5-Phosphate    | 265.089 | 26.224   | 1.824 | 0.033  | 3.814 |
| N4-Acetylcytidine                 | 284.088 | 158.482  | 2.206 | 0.000  | 4.718 |
| N-Acetylneuraminic acid           | 290.087 | 325.584  | 1.934 | 0.002  | 0.873 |
| Mevalonic acid                    | 295.139 | 316.777  | 1.128 | 0.039  | 0.679 |
| 3'-O-methylguanosine              | 296.099 | 189.024  | 1.546 | 0.034  | 1.213 |
| Eicosapentaenoic Acid             | 301.216 | 43.507   | 1.482 | 0.027  | 0.794 |
| Nicotinamide ribotide             | 333.057 | 408.698  | 1.397 | 0.028  | 0.803 |
| Behenic acid                      | 339.326 | 40.951   | 1.450 | 0.017  | 0.758 |
| Sucrose                           | 342.118 | 315.467  | 1.916 | 0.001  | 0.322 |
| Maltitol                          | 344.113 | 260.680  | 1.986 | 0.001  | 0.449 |
| Tricosanoic acid                  | 353.341 | 40.545   | 1.303 | 0.022  | 0.734 |
| Tetracosanoic acid                | 367.356 | 40.381   | 1.666 | 0.002  | 0.646 |
| Hexacosanoic acid                 | 395.387 | 39.835   | 1.557 | 0.007  | 0.555 |
| Fludrocortisone acetate           | 403.195 | 259.111  | 1.638 | 0.032  | 3.062 |
| 1-Palmitoyl Lysophosphatidic Acid | 409.234 | 180.801  | 1.371 | 0.036  | 0.849 |

|                                    |    |         |         |       |       |        |
|------------------------------------|----|---------|---------|-------|-------|--------|
| alpha-Tocopherol (Vitamin E)       |    | 429.371 | 31.841  | 1.462 | 0.036 | 2.004  |
| N-Formylmethionyl-                 |    | 436.197 | 294.122 | 1.575 | 0.001 | 0.334  |
| Leucylphenylalanine                |    |         |         |       |       |        |
| 1-Stearoyl-sn-glycerol             | 3- | 522.353 | 177.094 | 1.418 | 0.025 | 0.745  |
| phosphocholine                     |    |         |         |       |       |        |
| MK 571                             |    | 573.126 | 333.185 | 1.856 | 0.002 | 0.237  |
| <b>Postive</b>                     |    |         |         |       |       |        |
| Glycine                            |    | 76.039  | 368.020 | 1.935 | 0.000 | 0.420  |
| Diethanolamine                     |    | 88.076  | 211.625 | 2.175 | 0.000 | 21.985 |
| L-Alanine                          |    | 90.055  | 334.322 | 1.423 | 0.024 | 0.906  |
| Glutaraldehyde                     |    | 101.059 | 371.458 | 1.704 | 0.001 | 0.876  |
| Betaine aldehyde                   |    | 102.090 | 343.589 | 1.301 | 0.036 | 0.816  |
| N-Methylhydantoin                  |    | 115.049 | 334.322 | 1.579 | 0.003 | 0.889  |
| Acetyl glycine                     |    | 118.049 | 368.037 | 2.030 | 0.000 | 0.313  |
| Creatine                           |    | 132.077 | 334.322 | 1.369 | 0.038 | 0.898  |
| Nicotinamide N-oxide               |    | 139.049 | 150.762 | 1.297 | 0.023 | 0.679  |
| Larixinic Acid                     |    | 144.064 | 252.795 | 1.927 | 0.000 | 0.288  |
| Pyruvaldehyde                      |    | 145.049 | 293.416 | 1.778 | 0.040 | 2.011  |
| Levonordefrin                      |    | 148.074 | 171.378 | 1.432 | 0.014 | 0.692  |
| DL-a-Hydroxybutyric acid           |    | 149.022 | 33.168  | 1.914 | 0.000 | 0.480  |
| 2-Ethoxyethanol                    |    | 151.095 | 63.928  | 1.567 | 0.006 | 0.598  |
| Acetyl-DL-Leucine                  |    | 156.100 | 390.035 | 1.605 | 0.011 | 0.686  |
| Caproic acid                       |    | 158.117 | 47.430  | 1.707 | 0.010 | 2.156  |
| Acetyl-DL-Valine                   |    | 160.096 | 313.750 | 1.238 | 0.042 | 0.516  |
| Cyclohexylamine                    |    | 160.133 | 371.359 | 1.319 | 0.016 | 0.809  |
| trans-2-Octenoic acid              |    | 160.133 | 387.590 | 1.417 | 0.007 | 0.806  |
| 1-Aminocyclopropanecarboxylic acid |    | 162.075 | 252.795 | 1.776 | 0.001 | 0.483  |
| L-Carnitine                        |    | 162.111 | 292.158 | 1.139 | 0.047 | 0.844  |
| beta-Hydroxybutyrate               |    | 168.065 | 252.499 | 1.920 | 0.000 | 0.337  |
| L-Pipecolic acid                   |    | 171.112 | 252.565 | 1.987 | 0.006 | 0.191  |
| .beta.-Cyano-L-alanine             |    | 175.070 | 209.013 | 1.596 | 0.013 | 0.642  |
| L-Citrulline                       |    | 176.102 | 393.110 | 1.536 | 0.005 | 0.715  |
| 3,4-Dihydroxyphenylacetic acid     |    | 186.075 | 252.614 | 1.792 | 0.000 | 0.319  |
| Valproic acid                      |    | 186.174 | 37.645  | 1.954 | 0.000 | 1.872  |
| Kynuramine                         |    | 187.089 | 283.929 | 1.951 | 0.000 | 0.195  |
| L-Arabinose                        |    | 192.087 | 47.551  | 1.059 | 0.043 | 0.625  |
| Oxindole                           |    | 194.080 | 204.577 | 1.475 | 0.029 | 0.749  |
| Ala-Ala                            |    | 202.117 | 267.679 | 1.331 | 0.043 | 0.686  |
| Pyridostigmine cation              |    | 204.086 | 252.598 | 1.998 | 0.000 | 0.362  |
| Acetylcarnitine                    |    | 204.123 | 293.416 | 1.826 | 0.043 | 2.533  |
| Pelletierine                       |    | 205.126 | 293.423 | 1.840 | 0.046 | 2.617  |
| Pyridoxine                         |    | 211.106 | 85.616  | 1.602 | 0.002 | 0.552  |
| DL-Vanillylmandelic acid           |    | 216.085 | 352.428 | 1.530 | 0.020 | 0.586  |
| N-.alpha.-Acetyl-L-arginine        |    | 217.128 | 355.666 | 1.677 | 0.019 | 0.612  |

|                                       |         |         |       |       |       |
|---------------------------------------|---------|---------|-------|-------|-------|
| Thr-Val                               | 218.123 | 390.979 | 1.840 | 0.001 | 0.513 |
| D-Glucono-1,5-lactone                 | 220.080 | 394.621 | 1.489 | 0.004 | 0.470 |
| His-Ser                               | 225.097 | 303.662 | 1.732 | 0.025 | 2.342 |
| D-gluconate                           | 238.091 | 368.003 | 2.022 | 0.000 | 0.257 |
| Pro-Phe                               | 245.123 | 292.865 | 1.512 | 0.045 | 0.521 |
| Gly-Glu                               | 246.107 | 365.740 | 1.941 | 0.000 | 0.495 |
| Val-Gln                               | 246.144 | 313.231 | 2.013 | 0.000 | 0.134 |
| Glycerophosphocholine                 | 258.110 | 372.063 | 1.954 | 0.001 | 0.557 |
| 2-Methyl-3-hydroxybutyric acid        | 259.119 | 28.241  | 1.368 | 0.025 | 1.489 |
| 1,7-Dimethyluric acid                 | 260.073 | 370.201 | 2.017 | 0.000 | 0.325 |
| Flumequine                            | 261.076 | 370.429 | 1.982 | 0.000 | 0.536 |
| Phthalic acid Mono-2-ethylhexyl Ester | 279.158 | 33.252  | 2.106 | 0.000 | 0.418 |
| Val-Tyr                               | 280.138 | 313.221 | 1.753 | 0.000 | 0.377 |
| Phenylethylamine                      | 281.136 | 37.061  | 1.261 | 0.042 | 1.680 |
| Ile-Ser                               | 282.142 | 313.196 | 1.892 | 0.000 | 0.558 |
| Ile-Asn                               | 284.105 | 371.607 | 2.026 | 0.004 | 0.642 |
| N4-Acetylcytidine                     | 286.102 | 158.142 | 1.945 | 0.001 | 3.467 |
| Ile-Arg                               | 288.202 | 323.000 | 1.363 | 0.032 | 0.779 |
| Lys-Cys                               | 291.154 | 464.655 | 1.290 | 0.044 | 0.669 |
| Gamma-Glutamylcysteine                | 292.101 | 409.542 | 1.785 | 0.002 | 0.591 |
| gamma-L-Glutamyl-L-phenylalanine      | 295.127 | 323.362 | 1.197 | 0.024 | 0.789 |
| Gly-Arg                               | 295.149 | 433.332 | 1.579 | 0.005 | 0.441 |
| 16-Hydroxypalmitic acid               | 295.225 | 47.610  | 1.959 | 0.006 | 1.567 |
| Ile-Thr                               | 296.158 | 294.156 | 1.713 | 0.002 | 0.526 |
| 4-Oxoretinol                          | 301.215 | 35.353  | 1.742 | 0.004 | 1.661 |
| Lys-Asn                               | 305.119 | 326.400 | 1.218 | 0.038 | 0.618 |
| Tyr-Lys                               | 309.164 | 439.953 | 1.768 | 0.002 | 0.437 |
| Omeprazole                            | 310.094 | 364.899 | 1.915 | 0.001 | 0.400 |
| Pro-Met                               | 310.112 | 409.319 | 1.884 | 0.000 | 0.373 |
| Phe-Cys                               | 310.127 | 280.996 | 1.817 | 0.000 | 0.464 |
| Tyr-Phe                               | 311.132 | 370.987 | 2.099 | 0.000 | 0.397 |
| Met-Tyr                               | 312.113 | 306.241 | 1.735 | 0.001 | 0.374 |
| Argininosuccinic acid                 | 313.113 | 306.241 | 1.782 | 0.000 | 0.422 |
| His-Tyr                               | 318.128 | 410.891 | 1.856 | 0.000 | 0.501 |
| Zolmitriptan                          | 326.125 | 434.955 | 1.958 | 0.000 | 0.469 |
| N-Oleylethanolamine                   | 326.304 | 35.303  | 1.509 | 0.038 | 1.413 |
| D-Ribulose 1,5-bisphosphate           | 328.017 | 352.737 | 1.469 | 0.028 | 0.615 |
| Phe-Tyr                               | 328.138 | 280.875 | 1.823 | 0.000 | 0.358 |
| (-)-Medicarpin                        | 331.110 | 372.176 | 2.008 | 0.000 | 0.332 |
| beta-Octylglucoside                   | 337.159 | 354.300 | 1.954 | 0.000 | 0.336 |
| Arg-Tyr                               | 337.172 | 450.647 | 1.947 | 0.000 | 0.382 |
| Arg-Cys                               | 338.154 | 393.075 | 1.969 | 0.000 | 0.333 |
| Enoxacin                              | 338.162 | 353.817 | 2.001 | 0.000 | 0.383 |
| Arg-Thr                               | 339.175 | 451.272 | 1.993 | 0.000 | 0.452 |

|                                                     |         |         |       |       |        |
|-----------------------------------------------------|---------|---------|-------|-------|--------|
| Met-Met                                             | 344.099 | 323.627 | 1.730 | 0.001 | 0.463  |
| Famciclovir                                         | 344.133 | 315.326 | 1.851 | 0.001 | 0.298  |
| Lomefloxacin                                        | 352.146 | 295.811 | 1.817 | 0.003 | 1.523  |
| Visnadin                                            | 353.132 | 293.863 | 2.004 | 0.000 | 0.315  |
| (+)-5,6-DHET                                        | 356.277 | 83.476  | 1.947 | 0.008 | 0.155  |
| Behenic acid                                        | 358.366 | 51.570  | 1.231 | 0.014 | 0.507  |
| Cortisone                                           | 361.199 | 43.327  | 1.478 | 0.043 | 1.596  |
| 20-Hydroxyarachidonic acid                          | 362.268 | 43.412  | 1.508 | 0.028 | 0.606  |
| Phenoxybenzamine                                    | 367.148 | 282.726 | 1.874 | 0.000 | 0.318  |
| Tyr-Glu                                             | 371.143 | 294.147 | 2.046 | 0.003 | 0.254  |
| Cortexolone                                         | 385.170 | 364.673 | 1.732 | 0.007 | 0.452  |
| Diocetyl phthalate                                  | 391.283 | 32.456  | 1.291 | 0.049 | 1.386  |
| Troglitazone                                        | 459.206 | 338.329 | 2.073 | 0.012 | 0.082  |
| 1-Stearoyl-2-arachidonoyl-sn-glycerol               | 627.532 | 46.640  | 2.196 | 0.000 | 0.126  |
| PC(20:5(5Z,8Z,11Z,14Z,17Z)/20:5(5Z,8Z,11Z,14Z,17Z)) | 809.542 | 46.498  | 1.737 | 0.044 | 66.192 |

---

**Table S5.** Pathway analysis of serum metabolomics in PRB and CON groups of fattening sheep

| Pathway                                     | Total | Hits | Raw P | Impact | Hits compounds                                                                                 |
|---------------------------------------------|-------|------|-------|--------|------------------------------------------------------------------------------------------------|
| Glycine, serine and threonine metabolism    | 32    | 4    | 0.002 | 0.292  | Glycine cpd:C00037; Betaine aldehyde cpd:C00576; Creatine cpd:C00300; Pyruvaldehyde cpd:C00546 |
| Arginine and proline metabolism             | 44    | 3    | 0.046 | 0.061  | Citrulline cpd:C00327; Argininosuccinic acid cpd:C03406; Creatine cpd:C00300                   |
| Cyanoamino acid metabolism                  | 6     | 1    | 0.107 | 0      | Glycine cpd:C00037                                                                             |
| Methane metabolism                          | 9     | 1    | 0.157 | 0      | Glycine cpd:C00037                                                                             |
| Nitrogen metabolism                         | 9     | 1    | 0.157 | 0      | Glycine cpd:C00037                                                                             |
| Vitamin B6 metabolism                       | 9     | 1    | 0.157 | 0.078  | Pyridoxine cpd:C00314                                                                          |
| Phenylalanine metabolism                    | 9     | 1    | 0.157 | 0.222  | Phenylethylamine cpd:C05332                                                                    |
| Pentose and glucuronate interconversions    | 15    | 1    | 0.248 | 0      | L-Arabinose cpd:C00259                                                                         |
| Pentose phosphate pathway                   | 19    | 1    | 0.303 | 0      | Gluconolactone cpd:C00198                                                                      |
| Propanoate metabolism                       | 20    | 1    | 0.316 | 0      | 2-Hydroxybutyric acid cpd:C05984                                                               |
| Pyruvate metabolism                         | 22    | 1    | 0.342 | 0.054  | Pyruvaldehyde cpd:C00546                                                                       |
| Alanine, aspartate and glutamate metabolism | 23    | 1    | 0.354 | 0.020  | Argininosuccinic acid cpd:C03406                                                               |
| Porphyrin and chlorophyll metabolism        | 25    | 1    | 0.379 | 0      | Glycine cpd:C00037                                                                             |
| Glutathione metabolism                      | 26    | 1    | 0.390 | 0.006  | Glycine cpd:C00037                                                                             |
| Glycerophospholipid metabolism              | 29    | 1    | 0.425 | 0.024  | Glycerophosphocholine cpd:C00670                                                               |
| Biosynthesis of unsaturated fatty acids     | 42    | 1    | 0.553 | 0      | Behenic acid cpd:C08281                                                                        |
| Tyrosine metabolism                         | 42    | 1    | 0.553 | 0.001  | 3,4-Dihydroxybenzeneacetic acid cpd:C01161                                                     |
| Primary bile acid biosynthesis              | 46    | 1    | 0.586 | 0.030  | Glycine cpd:C00037                                                                             |
| Drug metabolism - cytochrome P450           | 56    | 1    | 0.660 | 0      | Valproic acid cpd:C07185                                                                       |
| Aminoacyl-tRNA biosynthesis                 | 64    | 1    | 0.709 | 0      | Glycine cpd:C00037                                                                             |

|                                             |    |   |       |       |                                                         |
|---------------------------------------------|----|---|-------|-------|---------------------------------------------------------|
| Steroid hormone biosynthesis                | 67 | 1 | 0.726 | 0.017 | Cortisone cpd:C00762                                    |
| Terpenoid backbone biosynthesis             | 15 | 2 | 0.020 | 0.317 | Mevalonic acid cpd:C00418; Mevalonic acid-5P cpd:C01107 |
| Pyrimidine metabolism                       | 37 | 2 | 0.105 | 0.001 | Dihydrothymine cpd:C00906; Beta-Alanine cpd:C00099      |
| Ascorbate and aldarate metabolism           | 9  | 1 | 0.128 | 0     | Ascorbic acid cpd:C00072                                |
| Valine, leucine and isoleucine biosynthesis | 11 | 1 | 0.155 | 0     | Pyruvic acid cpd:C00022                                 |
| Nicotinate and nicotinamide metabolism      | 13 | 1 | 0.180 | 0     | Nicotinamide ribotide cpd:C00455                        |
| Histidine metabolism                        | 14 | 1 | 0.193 | 0.130 | Urocanic acid cpd:C00785                                |
| Pantothenate and CoA biosynthesis           | 15 | 1 | 0.205 | 0     | Beta-Alanine cpd:C00099                                 |
| beta-Alanine metabolism                     | 17 | 1 | 0.229 | 0.444 | Beta-Alanine cpd:C00099                                 |
| Glycerolipid metabolism                     | 18 | 1 | 0.241 | 0.026 | Pyruvic acid cpd:C00022                                 |
| Butanoate metabolism                        | 20 | 1 | 0.264 | 0     | Pyruvic acid cpd:C00022                                 |
| Citrate cycle (TCA cycle)                   | 20 | 1 | 0.264 | 0.072 | Pyruvic acid cpd:C00022                                 |
| Glycolysis or Gluconeogenesis               | 26 | 1 | 0.329 | 0.099 | Pyruvic acid cpd:C00022                                 |
| Cysteine and methionine metabolism          | 28 | 1 | 0.350 | 0.021 | Pyruvic acid cpd:C00022                                 |
| Amino sugar and nucleotide sugar metabolism | 37 | 1 | 0.435 | 0     | Glucosamine cpd:C00329                                  |
| Tryptophan metabolism                       | 41 | 1 | 0.469 | 0.031 | L-Kynurenine cpd:C00328                                 |
| Purine metabolism                           | 68 | 1 | 0.654 | 0.000 | Allantoic acid cpd:C00499                               |

---

**Table S6.** Significant differences in metabolites between PRB and CON groups in urine of fattening sheep

| Name                                  | MZ      | R.T (min) | VIP   | Pvalue | FC    |
|---------------------------------------|---------|-----------|-------|--------|-------|
| <b>Negative</b>                       |         |           |       |        |       |
| Propionic acid                        | 73.030  | 135.036   | 1.383 | 0.015  | 0.254 |
| Taurine                               | 124.007 | 332.597   | 1.299 | 0.038  | 0.479 |
| Ammeline                              | 127.051 | 300.504   | 1.404 | 0.049  | 0.563 |
| Dihydroxyfumarate                     | 129.055 | 336.337   | 1.350 | 0.092  | 0.797 |
| Xylitol                               | 133.050 | 233.909   | 1.449 | 0.040  | 0.565 |
| Hydroxyacetone                        | 133.048 | 41.372    | 1.732 | 0.034  | 0.640 |
| Ethosuximide                          | 140.071 | 228.762   | 1.797 | 0.015  | 0.529 |
| Cyanuric acid                         | 145.036 | 96.040    | 1.337 | 0.046  | 2.153 |
| Gentisic acid                         | 153.019 | 145.061   | 1.518 | 0.025  | 0.464 |
| 3-Isopropylmalate                     | 157.049 | 131.265   | 1.487 | 0.029  | 0.500 |
| 3-Dehydroshikimic acid                | 171.028 | 320.273   | 1.666 | 0.023  | 0.552 |
| 3-Phosphoserine                       | 185.011 | 71.820    | 1.720 | 0.004  | 0.424 |
| sn-Glycerol 1-phosphate               | 188.091 | 253.285   | 1.873 | 0.025  | 0.483 |
| Salicyluric acid                      | 194.046 | 160.015   | 1.561 | 0.031  | 0.400 |
| Glucosaminic acid                     | 194.067 | 265.377   | 1.441 | 0.041  | 0.550 |
| N-Acetyl-L-aspartic acid              | 196.027 | 180.462   | 1.234 | 0.046  | 0.626 |
| O-Phospho-L-threonine                 | 199.028 | 51.153    | 1.511 | 0.024  | 0.458 |
| L-Serine                              | 290.080 | 192.562   | 1.638 | 0.021  | 0.538 |
| 5-L-Glutamyl-L-alanine                | 218.091 | 342.785   | 1.735 | 0.025  | 0.714 |
| L-Carnosine                           | 225.099 | 407.937   | 1.618 | 0.024  | 0.620 |
| L-Gulonic gamma-lactone               | 237.056 | 28.630    | 1.608 | 0.031  | 0.604 |
| 4-Hydroxybenzaldehyde                 | 243.069 | 46.267    | 1.446 | 0.011  | 0.547 |
| gamma-Glutamyl-L-methionine           | 259.071 | 269.993   | 1.573 | 0.042  | 0.555 |
| Isoproturon                           | 265.152 | 134.308   | 1.840 | 0.022  | 0.309 |
| Gentisaldehyde                        | 275.057 | 33.303    | 1.490 | 0.028  | 0.561 |
| 3-Deoxy-2-keto-6-phosphogluconic acid | 279.088 | 192.481   | 1.369 | 0.015  | 0.630 |
| Uridine                               | 281.017 | 296.587   | 1.804 | 0.026  | 0.545 |
| 5-methoxytryptophan                   | 293.121 | 248.128   | 1.709 | 0.042  | 0.316 |
| D-Ribulose 1,5-bisphosphate           | 309.986 | 28.091    | 1.726 | 0.032  | 0.650 |
| Sulfaphenazole                        | 313.072 | 67.821    | 1.376 | 0.042  | 0.535 |
| beta-Octylglucoside                   | 313.162 | 268.436   | 1.561 | 0.022  | 0.592 |
| D-Mannitol 1-phosphate                | 321.167 | 105.877   | 1.376 | 0.038  | 0.550 |
| Maltitol                              | 325.111 | 393.745   | 1.482 | 0.024  | 0.664 |
| Clozapine                             | 325.128 | 46.372    | 1.749 | 0.002  | 0.481 |
| Tosyllysine                           | 331.082 | 224.324   | 1.378 | 0.049  | 0.507 |
| Chloromethyl Ketone                   |         |           |       |        |       |

|                              |      |          |         |       |       |       |
|------------------------------|------|----------|---------|-------|-------|-------|
| Phloretin                    |      | 333.097  | 180.420 | 1.278 | 0.039 | 0.495 |
| 3'-O-methylguanosine         |      | 334.057  | 28.572  | 1.780 | 0.028 | 0.634 |
| Dicumarol                    |      | 335.052  | 102.248 | 1.452 | 0.016 | 0.601 |
| Thiamine monophosphate       |      | 343.067  | 72.633  | 1.636 | 0.010 | 0.448 |
| Phenolphthalein              |      | 355.045  | 45.751  | 1.565 | 0.036 | 0.674 |
| Flavin mononucleotide (FMN)  |      | 455.095  | 47.191  | 1.559 | 0.022 | 0.571 |
| UDP-D-Galactose              |      | 565..061 | 132.919 | 1.426 | 0.028 | 0.529 |
| <b>Postive</b>               |      |          |         |       |       |       |
| Glutaraldehyde               |      | 83.048   | 372.746 | 1.819 | 0.004 | 0.596 |
| Choline                      |      | 104.106  | 148.043 | 1.748 | 0.013 | 0.661 |
| 4-Aminophenol                |      | 110.059  | 89.159  | 1.568 | 0.038 | 0.674 |
| Cytosine                     |      | 112.050  | 158.047 | 1.619 | 0.017 | 0.553 |
| Benzamide                    |      | 122.058  | 79.855  | 1.724 | 0.016 | 0.689 |
| Taurine                      |      | 126.022  | 281.584 | 1.320 | 0.027 | 0.525 |
| 5-Methylcytosine             |      | 126.065  | 188.997 | 1.947 | 0.025 | 0.371 |
| 4-Hydroxybutanoic<br>lactone | acid | 128.070  | 78.507  | 1.377 | 0.043 | 0.728 |
| Ethosuximide                 |      | 142.085  | 229.273 | 1.771 | 0.008 | 0.661 |
| Oxyquinoline                 |      | 146.059  | 188.149 | 1.454 | 0.012 | 0.654 |
| Diacetyl                     |      | 150.054  | 44.796  | 1.517 | 0.031 | 0.560 |
| Phenol                       |      | 155.069  | 106.249 | 1.502 | 0.019 | 0.475 |
| Caffeic Acid                 |      | 163.041  | 169.290 | 1.454 | 0.047 | 0.690 |
| Formylanthranilic acid       |      | 165.039  | 197.187 | 1.599 | 0.047 | 0.712 |
| L-Canavanine                 |      | 176.089  | 262.291 | 1.379 | 0.035 | 0.704 |
| Succinate                    |      | 179.051  | 33.044  | 1.358 | 0.045 | 0.612 |
| 4-Imidazoleacetic acid       |      | 190.059  | 99.546  | 1.621 | 0.028 | 0.316 |
| 5-Hydroxyindoleacetate       |      | 192.065  | 35.225  | 1.715 | 0.029 | 0.590 |
| Jasmonic acid                |      | 193.120  | 184.510 | 1.611 | 0.037 | 0.614 |
| N-Phenylacetamide            |      | 196.095  | 80.847  | 1.568 | 0.042 | 0.572 |
| Gly-Gln                      |      | 203.089  | 245.191 | 1.281 | 0.046 | 0.613 |
| L-Tryptophan                 |      | 205.095  | 179.176 | 1.713 | 0.018 | 0.434 |
| 4-Aminobutyric acid          |      | 207.136  | 49.432  | 1.663 | 0.019 | 0.692 |
| Ibuprofen                    |      | 207.136  | 36.423  | 1.748 | 0.003 | 0.594 |
| Pyridoxal (Vitamin B6)       |      | 209.091  | 85.287  | 1.445 | 0.045 | 0.647 |
| D-Xylose                     |      | 211.078  | 210.453 | 1.738 | 0.042 | 0.586 |
| Triethanolamine              |      | 213.122  | 401.241 | 1.567 | 0.038 | 0.675 |
| Desipramine                  |      | 231.170  | 51.509  | 1.905 | 0.022 | 0.402 |
| N-Acetylglutamine            |      | 233.051  | 26.581  | 1.820 | 0.040 | 0.586 |
| L-Valine                     |      | 235.167  | 49.399  | 1.779 | 0.008 | 0.554 |
| (+)-Muscarine cation         |      | 241.106  | 29.296  | 1.709 | 0.029 | 0.665 |
| D-Mannose                    |      | 244.076  | 277.916 | 1.778 | 0.014 | 2.096 |
| Arg-Ser                      |      | 244.138  | 438.351 | 1.650 | 0.028 | 0.759 |
| Lamivudine                   |      | 247.090  | 165.967 | 1.669 | 0.021 | 0.678 |
| Ile-Thr                      |      | 255.133  | 485.522 | 1.968 | 0.024 | 0.341 |



|                                               |         |         |       |       |       |
|-----------------------------------------------|---------|---------|-------|-------|-------|
| 3-Hydroxyflavone                              | 256.103 | 233.994 | 1.467 | 0.040 | 0.626 |
| Arg-Cys                                       | 260.112 | 165.375 | 1.259 | 0.022 | 0.533 |
| Phe-Pro                                       | 263.138 | 221.295 | 1.660 | 0.016 | 0.607 |
| Gly-Glu                                       | 265.106 | 228.713 | 2.113 | 0.008 | 0.685 |
| 5'-Deoxyadenosine                             | 269.135 | 234.703 | 1.327 | 0.050 | 0.867 |
| Palmitic acid                                 | 274.272 | 63.210  | 1.715 | 0.047 | 0.383 |
| Tyr-Pro                                       | 278.126 | 27.976  | 1.626 | 0.039 | 0.652 |
| N-.alpha.-Acetyl-L-arginine                   | 280.141 | 27.976  | 1.785 | 0.010 | 0.517 |
| Gemcitabine                                   | 286.056 | 176.096 | 1.589 | 0.015 | 0.620 |
| N4-Acetylcytidine                             | 286.103 | 158.691 | 1.575 | 0.028 | 0.545 |
| Nortriptyline                                 | 286.163 | 181.948 | 1.899 | 0.006 | 0.394 |
| Tyr-Gln                                       | 292.127 | 33.609  | 1.834 | 0.002 | 0.425 |
| Trp-Cys                                       | 308.108 | 213.680 | 1.913 | 0.006 | 0.500 |
| Ser-Lys                                       | 310.052 | 338.549 | 1.544 | 0.017 | 0.493 |
| 15-Deoxy-delta-12,14-PGJ2                     | 317.208 | 49.084  | 1.529 | 0.042 | 0.688 |
| 2-Oxoadipic acid                              | 321.086 | 46.427  | 1.977 | 0.000 | 0.360 |
| Ile-Ala-Arg                                   | 323.219 | 49.283  | 1.757 | 0.011 | 0.626 |
| Deoxycoformycin                               | 332.131 | 272.230 | 1.532 | 0.018 | 0.648 |
| (+)-5,6-DHET                                  | 339.250 | 49.847  | 1.706 | 0.022 | 0.662 |
| Arg-Trp                                       | 360.190 | 230.251 | 1.363 | 0.040 | 0.619 |
| Eicosapentaenoic acid                         | 363.249 | 49.309  | 1.865 | 0.019 | 0.579 |
| 3.alpha.-Mannobiose                           | 365.102 | 430.633 | 1.869 | 0.042 | 1.319 |
| Fluvoxamine                                   | 382.169 | 149.788 | 1.685 | 0.042 | 0.475 |
| Midazolam                                     | 389.092 | 43.451  | 1.586 | 0.027 | 0.617 |
| Homoveratric acid                             | 415.138 | 49.096  | 1.609 | 0.009 | 0.668 |
| Cytidine 5'-diphosphocholine<br>(CDP-choline) | 489.112 | 199.244 | 1.489 | 0.045 | 0.708 |
| Cytidine 5'-diphosphocholine<br>(CDP-choline) | 496.335 | 181.366 | 1.414 | 0.035 | 0.596 |

---

**Table S7.** Pathway analysis of urine metabolomics in PRB and CON groups of fattening sheep

| Pathway                                     | Total | Hits | Raw P | Impact | Hits compounds                                                                                                               |
|---------------------------------------------|-------|------|-------|--------|------------------------------------------------------------------------------------------------------------------------------|
| Tryptophan metabolism                       | 41    | 4    | 0.009 | 0.201  | L-Tryptophan cpd:C00078; 5-Hydroxyindoleacetic acid cpd:C05635; Oxoadipic acid cpd:C00322; Formylanthranilic acid cpd:C05653 |
| Glycerophospholipid metabolism              | 29    | 2    | 0.121 | 0.092  | Citicoline cpd:C00307; Choline cpd:C00114                                                                                    |
| Taurine and hypotaurine metabolism          | 7     | 1    | 0.137 | 0.750  | Taurine cpd:C00245                                                                                                           |
| Vitamin B6 metabolism                       | 9     | 1    | 0.173 | 0.490  | Pyridoxal cpd:C00250                                                                                                         |
| Valine, leucine and isoleucine biosynthesis | 11    | 1    | 0.208 | 0.333  | L-Valine cpd:C00183                                                                                                          |
| Biosynthesis of unsaturated fatty acids     | 42    | 2    | 0.217 | 0      | Palmitic acid cpd:C00249; Eicosapentaenoic acid cpd:C06428                                                                   |
| Pantothenate and CoA biosynthesis           | 15    | 1    | 0.272 | 0      | L-Valine cpd:C00183                                                                                                          |
| Pentose and glucuronate interconversions    | 15    | 1    | 0.272 | 0.083  | D-Xylose cpd:C00181                                                                                                          |
| Terpenoid backbone biosynthesis             | 15    | 1    | 0.272 | 0.172  | Mevalonic acid-5P cpd:C01107                                                                                                 |
| Propanoate metabolism                       | 20    | 1    | 0.346 | 0      | Succinic acid cpd:C00042                                                                                                     |
| Butanoate metabolism                        | 20    | 1    | 0.346 | 0      | Succinic acid cpd:C00042                                                                                                     |
| Citrate cycle (TCA cycle)                   | 20    | 1    | 0.346 | 0.026  | Succinic acid cpd:C00042                                                                                                     |
| Lysine degradation                          | 20    | 1    | 0.346 | 0.090  | Oxoadipic acid cpd:C00322                                                                                                    |
| Alanine, aspartate and glutamate metabolism | 23    | 1    | 0.386 | 0      | Succinic acid cpd:C00042                                                                                                     |
| Aminoacyl-tRNA biosynthesis                 | 64    | 2    | 0.389 | 0      | L-Valine cpd:C00183; L-Tryptophan cpd:C00078                                                                                 |
| Fatty acid elongation in mitochondria       | 27    | 1    | 0.437 | 0      | Palmitic acid cpd:C00249                                                                                                     |
| Glycine, serine and threonine metabolism    | 32    | 1    | 0.494 | 0      | Choline cpd:C00114                                                                                                           |
| Fatty acid biosynthesis                     | 38    | 1    | 0.556 | 0      | Palmitic acid cpd:C00249                                                                                                     |
| Valine, leucine and isoleucine degradation  | 38    | 1    | 0.556 | 0      | L-Valine cpd:C00183                                                                                                          |
| Fatty acid metabolism                       | 39    | 1    | 0.565 | 0      | Palmitic acid cpd:C00249                                                                                                     |

|                                             |    |   |       |       |                                                         |
|---------------------------------------------|----|---|-------|-------|---------------------------------------------------------|
| Primary bile acid biosynthesis              | 46 | 1 | 0.627 | 0.030 | Taurine cpd:C00245                                      |
| Cyanoamino acid metabolism                  | 6  | 1 | 0.087 | 0     | L-Serine cpd:C00065                                     |
| Thiamine metabolism                         | 7  | 1 | 0.101 | 0     | Thiamine monophosphate cpd:C01081                       |
| Ascorbate and aldarate metabolism           | 9  | 1 | 0.128 | 0     | L-Gulonolactone cpd:C01040                              |
| Methane metabolism                          | 9  | 1 | 0.128 | 0.400 | L-Serine cpd:C00065                                     |
| Tyrosine metabolism                         | 42 | 2 | 0.130 | 0     | Gentisate aldehyde cpd:C05585; Gentisic acid cpd:C00628 |
| Riboflavin metabolism                       | 11 | 1 | 0.155 | 0.333 | Flavin Mononucleotide cpd:C00061                        |
| Histidine metabolism                        | 14 | 1 | 0.193 | 0     | Carnosine cpd:C00386                                    |
| Sphingolipid metabolism                     | 21 | 1 | 0.275 | 0     | L-Serine cpd:C00065                                     |
| Galactose metabolism                        | 26 | 1 | 0.329 | 0.005 | Uridine diphosphategalactose cpd:C00052                 |
| Cysteine and methionine metabolism          | 28 | 1 | 0.350 | 0.023 | L-Serine cpd:C00065                                     |
| Amino sugar and nucleotide sugar metabolism | 37 | 1 | 0.435 | 0     | Uridine diphosphategalactose cpd:C00052                 |
| Pyrimidine metabolism                       | 37 | 1 | 0.435 | 0.021 | Uridine cpd:C00299                                      |

---

**Table S8.** Analysis of significant differential expression of circRNA between PRB group and CON group

| circRNA id <sup>1</sup> | MeanRPKM <sup>2</sup><br>(PRB) | MeanRPKM<br>(CON) | log2FoldChange <sup>3</sup> | Pvalue <sup>4</sup> |
|-------------------------|--------------------------------|-------------------|-----------------------------|---------------------|
| <b>Up</b>               |                                |                   |                             |                     |
| circRNA04879            | 713.968                        | 0.000             | 22.767                      | 0.040               |
| circRNA04891            | 666.931                        | 0.000             | 22.669                      | 0.039               |
| circRNA00099            | 593.008                        | 100.101           | 2.567                       | 0.024               |
| <b>Down</b>             |                                |                   |                             |                     |
| circRNA01712            | 0.000                          | 175.609           | -20.744                     | 0.017               |
| circRNA01506            | 0.000                          | 470.300           | -22.165                     | 0.044               |
| circRNA02476            | 97.405                         | 196.253           | -1.011                      | 0.041               |
| circRNA04326            | 0.000                          | 355.816           | -21.763                     | 0.005               |

<sup>1</sup> circRNA ID: Transcript number.

<sup>2</sup> MeanTPM: Expression level of grouping.

<sup>3</sup> log2FoldChange: log2 value of difference multiple.

<sup>4</sup> Pvalue: Statistical significance test indicators.

**Table S9.** Significant differential expression analysis of transcripts (lncRNA, mRNA)

between PRB group and CON group

| Transcript id <sup>1</sup> | MeanTPM<br>(PRB) | MeanTPM<br>(CON) | log2FoldChange | Pvalue |
|----------------------------|------------------|------------------|----------------|--------|
| <b>Up</b>                  |                  |                  |                |        |
| MSTRG.32443.1              | 911.183          | 151.893          | 2.585          | 0.000  |
| MSTRG.34857.9              | 6.250            | 0.000            | 15.932         | 0.000  |
| MSTRG.96967.4              | 9.373            | 0.243            | 5.268          | 0.000  |
| MSTRG.34857.10             | 9.733            | 0.000            | 16.571         | 0.000  |
| MSTRG.61223.7              | 11.583           | 2.093            | 2.468          | 0.000  |
| MSTRG.86362.1              | 41.113           | 0.000            | 18.649         | 0.000  |
| ENSOART00000019541         | 7.213            | 1.567            | 2.203          | 0.000  |
| ENSOART00000008854         | 23.977           | 1.057            | 4.504          | 0.000  |
| ENSOART00000002985         | 5.913            | 0.833            | 2.827          | 0.000  |
| <b>Down</b>                |                  |                  |                |        |
| MSTRG.16260.13             | 0.000            | 5.653            | -15.787        | 0.000  |
| MSTRG.16260.15             | 0.000            | 10.920           | -16.737        | 0.000  |
| ENSOART00000016500         | 261.843          | 706.157          | -1.431         | 0.000  |
| ENSOART00000000735         | 0.000            | 7.543            | -16.203        | 0.000  |
| ENSOART00000004171         | 0.000            | 6.160            | -15.911        | 0.000  |
| ENSOART00000014309         | 0.107            | 10.300           | -6.593         | 0.000  |
| ENSOART00000008853         | 0.003            | 21.480           | -12.654        | 0.000  |
| ENSOART00000007695         | 15.077           | 33.660           | -1.159         | 0.000  |
| ENSOART00000014234         | 0.050            | 37.867           | -9.565         | 0.000  |
| ENSOART00000020258         | 48.740           | 141.280          | -1.535         | 0.000  |
| ENSOART00000013884         | 0.180            | 73.297           | -8.670         | 0.000  |

<sup>1</sup>Transcript ID: Transcript number.
